# Supplementary material for: Syntheses, structures, in vitro cytostatic activity and antifungal activity evaluation of four diorganotin(iv) complexes based on norfloxacin and levofloxacin
Source: Royal Society of Chemistry journal article supplement (doi:10.1039/d1nj05742a), 2022-01-01
Supplement: d1nj05742a1.pdf [file d1nj05742a1.pdf]

## Electronic Supplementary Information

Qiang Guo<sup>a</sup>, Ru-Fen Zhang<sup>\*a</sup>, Xue-Wen Hua<sup>b</sup>, Qian-Li Li<sup>a</sup>, Xiu-Mei Du<sup>a</sup>, Jing Ru<sup>a</sup>, Chun-Lin Ma<sup>\*a</sup>

*a* Institution of Functional Organic Molecules and Materials, School of Chemistry and Chemical Engineering, Liaocheng University, Liaocheng, 252059, China.

*b* College of Agriculture, Liaocheng University, 252000, Liaocheng, Shandong, China

E-mail: macl856@163.com zhangrf856@163.com

## Table of contents

### 1. X-ray crystallography

**Table S1.** Selected bond lengths [Å] and angles [°] for complex 1

**Table S2.** Selected bond lengths [Å] and angles [°] for complex 2

**Table S3.** Selected bond lengths [Å] and angles [°] for complex 3

**Table S4.** Selected bond lengths [Å] and angles [°] for complex 4

**Table S5.** Comparison of Sn-O bond length of reported organotin(IV) complexes.

### 2. Percentage inhibition of complexes 2 and 4

**Figure S1.** Percentage inhibition of complex 2

**Figure S2.** Percentage inhibition of complex 4

### 3. <sup>1</sup>H NMR spectra of complexes 1-4

**Figure S3-S6.** <sup>1</sup>H NMR spectra data of complexes 1-4

**Figure S7-S8.** <sup>1</sup>H NMR spectra data of HL<sub>1</sub> and HL<sub>2</sub>

### 4. <sup>13</sup>C NMR spectra of complexes 2-4

**Figure S9-S11.** <sup>13</sup>C NMR spectra data of complexes 2-4

**Figure S12-S13.** <sup>13</sup>C NMR spectra data of HL<sub>1</sub> and HL<sub>2</sub>

### 5. <sup>119</sup>Sn NMR spectra

**Figure S14.** <sup>119</sup>Sn NMR spectra data of complexes 2

**Figure S15.** <sup>119</sup>Sn NMR spectra data of complexes 3

**Figure S16.** <sup>119</sup>Sn NMR spectra data of complexes 4

### 6. HSQC of complex 2-4 and ligands

**Figure S17.** HSQC spectrum for complex 2

**Figure S18.** HSQC spectrum for HL<sub>1</sub>

**Figure S19.** HSQC spectrum for complex 3

**Figure S20.** HSQC spectrum for complex 4

**Figure S21.** HSQC spectrum for HL<sub>2</sub>

### 7. ADPs of complexes 2-4

**Figure S22.** Molecular structure of complex 2 which the ellipsoids are represented at 30% probability

**Figure S23.** Molecular structure of complex 3 which the ellipsoids are represented at 30% probability

**Figure S24.** Molecular structure of complex 4 which the ellipsoids are represented at 30% probability

## 1. X-ray crystallography

**Table S1.** Bond lengths (Å) and Bond angles (°) of Complex 1.

| Bond lengths (Å) |          |             |          |
|------------------|----------|-------------|----------|
| Sn(1)-O(1)       | 2.335(5) | Sn(1)-C(4)  | 2.108(8) |
| Sn(1)-C(3)       | 2.099(8) | Sn(1)-O(7)  | 2.075(5) |
| Sn(1)-O(7A)      | 2.022(5) | Sn(2)-O(4)  | 2.209(5) |
| Sn(2)-O(3)       | 2.499(5) | Sn(2)-O(1)  | 2.421(5) |
| Sn(2)-O(6)       | 2.321(5) | Sn(2)-C(7)  | 2.105(8) |
| Sn(2)-C(6)       | 2.093(8) | Sn(2)-O(7A) | 2.078(5) |
| O(7)-Sn(1A)      | 2.022(5) | O(7)-Sn(2A) | 2.078(5) |

  

| Bond angles (°)    |            |                    |            |
|--------------------|------------|--------------------|------------|
| O(1)-Sn(1)-Sn(1A)  | 107.96(12) | C(4)-Sn(1)-Sn(1A)  | 110.2(2)   |
| C(4)-Sn(1)-O(1)    | 90.9(3)    | C(3)-Sn(1)-Sn(1A)  | 110.4(2)   |
| C(3)-Sn(1)-O(1)    | 91.6(3)    | C(3)-Sn(1)-C(4)    | 136.3(3)   |
| O(7)-Sn(1)-Sn(1A)  | 36.71(13)  | O(7A)-Sn(1)-Sn(1A) | 37.83(13)  |
| O(7)-Sn(1)-O(1)    | 144.57(17) | O(7A)-Sn(1)-O(1)   | 70.19(18)  |
| O(7)-Sn(1)-C(4)    | 99.6(3)    | O(7A)-Sn(1)-C(4)   | 112.7(3)   |
| O(7)-Sn(1)-C(3)    | 103.2(3)   | O(7A)-Sn(1)-C(3)   | 109.2(3)   |
| O(7A)-Sn(1)-O(7)   | 74.5(2)    | O(4)-Sn(2)-O(3)    | 147.91(16) |
| O(4)-Sn(2)-O(1)    | 142.47(16) | O(4)-Sn(2)-O(6)    | 76.43(17)  |
| O(1)-Sn(2)-O(3)    | 69.61(15)  | O(6)-Sn(2)-O(3)    | 71.49(17)  |
| O(6)-Sn(2)-O(1)    | 141.04(17) | C(7)-Sn(2)-O(4)    | 94.5(3)    |
| C(7)-Sn(2)-O(3)    | 84.1(3)    | C(7)-Sn(2)-O(1)    | 87.7(3)    |
| C(7)-Sn(2)-O(6)    | 86.4(3)    | C(6)-Sn(2)-O(4)    | 96.6(3)    |
| C(6)-Sn(2)-O(3)    | 81.1(3)    | C(6)-Sn(2)-O(1)    | 89.6(3)    |
| C(6)-Sn(2)-O(6)    | 86.4(3)    | C(6)-Sn(2)-C(7)    | 165.0(3)   |
| O(7A)-Sn(2)-O(4)   | 74.94(18)  | O(7A)-Sn(2)-O(3)   | 137.15(17) |
| O(7A)-Sn(2)-O(1)   | 67.57(17)  | O(7A)-Sn(2)-O(6)   | 151.36(18) |
| O(7A)-Sn(2)-C(7)   | 95.4(3)    | O(7A)-Sn(2)-C(6)   | 97.2(3)    |
| Sn(1A)-O(7)-Sn(2A) | 123.4(2)   | Sn(1)-O(7)-Sn(2A)  | 130.9(2)   |

Symmetry code for complex 1: A: 1-x, 2-y, 1-z.

**Table S2.** Bond lengths (Å) and Bond angles (°) of Complex **2**.

| Bond lengths (Å) |           |                  |            |
|------------------|-----------|------------------|------------|
| Sn(1)-O(1)       | 2.094(3)  | Sn(1)-O(3)       | 2.199(4)   |
| Sn(1)-O(6)       | 2.176(4)  | Sn(1)-O(4)       | 2.099(4)   |
| Sn(1)-C(1)       | 2.146(7)  | Sn(1)-C(7)       | 2.136(6)   |
| Bond angles (°)  |           |                  |            |
| C(7)-Sn(1)-O(6)  | 162.9(2)  | C(7)-Sn(1)-O(3)  | 87.3(2)    |
| C(7)-Sn(1)-C(1)  | 105.1(3)  | O(1)-Sn(1)-O(4)  | 163.76(14) |
| O(6)-Sn(1)-O(3)  | 76.89(14) | O(1)-Sn(1)-C(7)  | 99.3(2)    |
| O(1)-Sn(1)-O(6)  | 84.72(15) | O(1)-Sn(1)-O(3)  | 81.32(14)  |
| O(1)-Sn(1)-C(1)  | 91.5(2)   | O(4)-Sn(1)-C(7)  | 91.3(2)    |
| O(4)-Sn(1)-O(3)  | 87.05(15) | C(1)-Sn(1)-O(3)  | 166.7(2)   |
| O(4)-Sn(1)-O(6)  | 81.62(15) | O(6)-Sn(1)-O(3)  | 87.05(15)  |
| O(4)-Sn(1)-C(1)  | 97.5(2)   | C(1)-Sn(1)-O(6)  | 91.3(2)    |
| C(8)-C(7)-Sn(1)  | 120.8(5)  | C(12)-C(7)-Sn(1) | 122.8(5)   |
| C(30)-O(6)-Sn(1) | 123.3(3)  | C(13)-O(3)-Sn(1) | 125.8(3)   |
| C(44)-O(1)-Sn(1) | 134.1(3)  | C(28)-O(4)-Sn(1) | 133.4(3)   |
| C(6)-C(1)-Sn(1)  | 119.3(3)  | C(2)-C(1)-Sn(1)  | 123.2(3)   |

**Table S3.** Bond lengths (Å) and Bond angles (°) of Complex **3**

| Bond lengths (Å) |           |             |           |
|------------------|-----------|-------------|-----------|
| Sn(3)-O(13)      | 2.024(9)  | Sn(3)-O(14) | 2.065(9)  |
| Sn(3)-C(37)      | 2.069(19) | Sn(3)-C(38) | 2.039(15) |
| Sn(2)-O(1)       | 2.353(11) | Sn(2)-O(3)  | 2.372(12) |
| Sn(2)-O(7)       | 2.339(12) | Sn(2)-O(9)  | 2.420(10) |
| Sn(2)-O(13)      | 2.055(8)  | Sn(4)-O(14) | 2.094(9)  |
| Sn(2)-C(18)      | 2.071(17) | Sn(2)-C(19) | 2.031(14) |
| Sn(4)-O(4)       | 2.375(11) | Sn(4)-O(6)  | 2.346(10) |
| Sn(4)-O(12)      | 2.338(12) | Sn(4)-O(10) | 2.342(10) |
| Sn(4)-C(41)      | 2.011(16) | Sn(4)-C(42) | 2.020(18) |
| Sn(1)-O(13)      | 2.064(9)  | Sn(1)-O(14) | 1.991(10) |
| Sn(1)-C(39)      | 2.045(17) | Sn(1)-C(40) | 2.089(15) |
| Sn(3)-O(7)       | 2.575(9)  | Sn(3)-O(10) | 2.697(9)  |
| Sn(1)-O(1)       | 2.733(10) | Sn(1)-O(4)  | 2.607(8)  |

  

| Bond angles (°)   |          |                   |          |
|-------------------|----------|-------------------|----------|
| O(13)-Sn(3)-O(14) | 75.6(4)  | O(13)-Sn(3)-C(37) | 106.5(7) |
| O(13)-Sn(3)-C(38) | 105.1(6) | O(14)-Sn(3)-C(37) | 104.3(6) |
| C(38)-Sn(3)-O(14) | 106.1(5) | C(38)-Sn(3)-C(37) | 140.4(8) |
| O(1)-Sn(2)-O(3)   | 72.2(4)  | O(1)-Sn(2)-O(9)   | 144.2(4) |
| O(3)-Sn(2)-O(9)   | 72.9(4)  | O(7)-Sn(2)-O(1)   | 143.7(4) |
| O(7)-Sn(2)-O(3)   | 144.7(4) | O(7)-Sn(2)-O(9)   | 72.5(4)  |
| O(13)-Sn(2)-O(1)  | 72.5(4)  | O(13)-Sn(2)-O(3)  | 144.4(4) |
| O(13)-Sn(2)-O(7)  | 70.5(4)  | O(13)-Sn(2)-O(9)  | 142.7(4) |
| O(13)-Sn(2)-C(18) | 95.6(5)  | C(18)-Sn(2)-O(1)  | 90.6(7)  |
| C(18)-Sn(2)-O(3)  | 89.0(6)  | C(18)-Sn(2)-O(7)  | 92.1(6)  |
| C(18)-Sn(2)-O(9)  | 81.3(6)  | C(19)-Sn(2)-O(1)  | 96.8(6)  |
| C(19)-Sn(2)-O(3)  | 81.5(5)  | C(19)-Sn(2)-O(7)  | 89.5(6)  |
| C(19)-Sn(2)-O(9)  | 85.4(5)  | C(19)-Sn(2)-O(13) | 98.6(5)  |
| C(19)-Sn(2)-C(18) | 165.4(6) | O(14)-Sn(4)-O(4)  | 69.7(3)  |
| O(14)-Sn(4)-O(6)  | 142.6(4) | O(14)-Sn(4)-O(12) | 144.7(4) |
| O(14)-Sn(4)-O(10) | 72.8(4)  | O(6)-Sn(4)-O(4)   | 73.1(3)  |

|                   |           |                   |           |
|-------------------|-----------|-------------------|-----------|
| O(12)-Sn(4)-O(4)  | 145.4(3)  | O(12)-Sn(4)-O(6)  | 72.6(4)   |
| O(12)-Sn(4)-O(10) | 72.0(4)   | O(10)-Sn(4)-O(4)  | 142.5(4)  |
| O(10)-Sn(4)-O(6)  | 144.0(4)  | C(41)-Sn(4)-O(14) | 96.3(5)   |
| C(41)-Sn(4)-O(4)  | 90.9(5)   | C(41)-Sn(4)-O(6)  | 88.4(6)   |
| C(41)-Sn(4)-O(12) | 84.0(5)   | C(41)-Sn(4)-O(10) | 94.8(5)   |
| C(41)-Sn(4)-C(42) | 169.0(7)  | C(41)-Sn(4)-O(14) | 94.8(5)   |
| C(41)-Sn(4)-O(4)  | 93.0(6)   | C(41)-Sn(4)-O(6)  | 82.8(6)   |
| C(41)-Sn(4)-O(12) | 87.0(6)   | C(41)-Sn(4)-O(10) | 88.4(6)   |
| O(13)-Sn(1)-C(40) | 108.4(5)  | O(14)-Sn(1)-O(13) | 76.3(4)   |
| O(14)-Sn(1)-C(39) | 106.4(6)  | O(14)-Sn(1)-C(40) | 107.9(6)  |
| C(39)-Sn(1)-O(13) | 105.7(6)  | C(39)-Sn(1)-C(40) | 136.1(6)  |
| C(80)-O(1)-Sn(2)  | 136.8(11) | C(13)-O(3)-Sn(2)  | 133.3(11) |
| C(81)-O(7)-Sn(2)  | 136.7(14) | C(29)-O(9)-Sn(2)  | 137.3(11) |
| Sn(3)-O(13)-Sn(2) | 127.2(5)  | Sn(3)-O(13)-Sn(1) | 103.4(4)  |
| Sn(2)-O(13)-Sn(1) | 129.3(5)  | Sn(3)-O(14)-Sn(4) | 126.6(5)  |
| Sn(1)-O(14)-Sn(3) | 104.6(4)  | Sn(1)-O(14)-Sn(4) | 128.8(4)  |
| C(43)-O(4)-Sn(4)  | 141.3(11) | C(45)-O(6)-Sn(4)  | 135.1(10) |
| C(62)-O(12)-Sn(4) | 136.1(11) | C(61)-O(10)-Sn(4) | 137.3(11) |

**Table S4.** Bond lengths (Å) and Bond angles (°) of Complex 4.

| Bond lengths (Å) |           |                  |           |
|------------------|-----------|------------------|-----------|
| Sn(1)-O(1)       | 2.082(15) | Sn(1)-O(3)       | 2.143(12) |
| Sn(1)-O(4)       | 2.120(2)  | Sn(1)-O(6)       | 2.170(15) |
| Sn(1)-C(1)       | 2.140(2)  | Sn(1)-C(7)       | 2.160(19) |
| Bond angles (°)  |           |                  |           |
| O(1)-Sn(1)-O(3)  | 83.5(7)   | O(1)-Sn(1)-O(4)  | 160.4(6)  |
| O(1)-Sn(1)-O(6)  | 81.5(7)   | O(1)-Sn(1)-C(1)  | 96.0(9)   |
| O(1)-Sn(1)-C(7)  | 95.7(9)   | O(3)-Sn(1)-O(6)  | 77.8(5)   |
| O(3)-Sn(1)-C(1)  | 89.6(6)   | O(3)-Sn(1)-C(7)  | 168.2(7)  |
| O(4)-Sn(1)-O(3)  | 81.5(7)   | O(4)-Sn(1)-O(6)  | 83.0(7)   |
| O(4)-Sn(1)-C(1)  | 96.4(9)   | O(4)-Sn(1)-C(7)  | 96.4(10)  |
| C(1)-Sn(1)-O(6)  | 167.3(6)  | C(1)-Sn(1)-C(7)  | 102.2(8)  |
| C(7)-Sn(1)-O(6)  | 90.4(7)   | C(80)-O(1)-Sn(1) | 130.0(16) |
| C(13)-O(3)-Sn(1) | 127.1(13) | C(31)-O(4)-Sn(1) | 129.6(19) |
| C(33)-O(6)-Sn(1) | 122.4(15) | C(2)-C(1)-Sn(1)  | 118.6(16) |
| C(6)-C(1)-Sn(1)  | 123.6(17) | C(8)-C(7)-Sn(1)  | 116.5(17) |
| C(12)-C(7)-Sn(1) | 124(2)    |                  |           |

**Table S5.** Comparison of Sn-O bond length of reported organotin(IV) complexes.

| Organotin complexes                                                                                               | Bond length of Sn-O | Ref       |
|-------------------------------------------------------------------------------------------------------------------|---------------------|-----------|
| $[(\text{Me}_2\text{Sn})_2(\text{O}_2\text{CCH}_2\text{S})_2\text{C}_2\text{N}_2\text{S}(\text{I}_3\text{-O})]_n$ | 2.011-2.288 Å       | 41        |
| $\{[\text{Me}_2\text{Sn}(\text{cycloCH}_2)_2\text{CHCOO}]_2\text{O}\}_2$                                          | 2.224-2.317 Å       | 42        |
| $[(\text{CH}_3)_2\text{Sn}(\text{OOC}_6\text{H}_4\text{OH})_2]$                                                   | 2.016-2.557 Å       | 48        |
| $[(n\text{-C}_4\text{H}_9)_2\text{Sn}(\text{OOC}_6\text{H}_4\text{OH})_2]$                                        | 2.104-2.632 Å       |           |
| $\text{Bu}_2\text{Sn}[\text{HL}^2]_2(\text{L}=4\text{-}(2\text{-hydroxynaphthylazo)benzoic acid})$                | 2.060-2.647 Å       | 49        |
| $[(\text{Me}_2\text{Sn})_4\text{O}_2(\text{C}_{16}\text{H}_{17}\text{FN}_3\text{O}_3)_4]$                         | 2.075 -2.499Å       | Complex 1 |
| $[\text{Ph}_2\text{Sn}(\text{C}_{16}\text{H}_{17}\text{FN}_3\text{O}_3)_2]$                                       | 2.094-2.199 Å       | Complex 2 |
| $[(\text{Me}_2\text{Sn})_4\text{O}_2(\text{C}_{18}\text{H}_{19}\text{FN}_3\text{O}_4)_4]$                         | 1.991-2.420 Å       | Complex 3 |
| $[\text{Ph}_2\text{Sn}(\text{C}_{18}\text{H}_{19}\text{FN}_3\text{O}_4)_2]$                                       | 2.082-2.170 Å       | Complex 4 |

## 2. Percentage inhibition of complexes 2 and 4

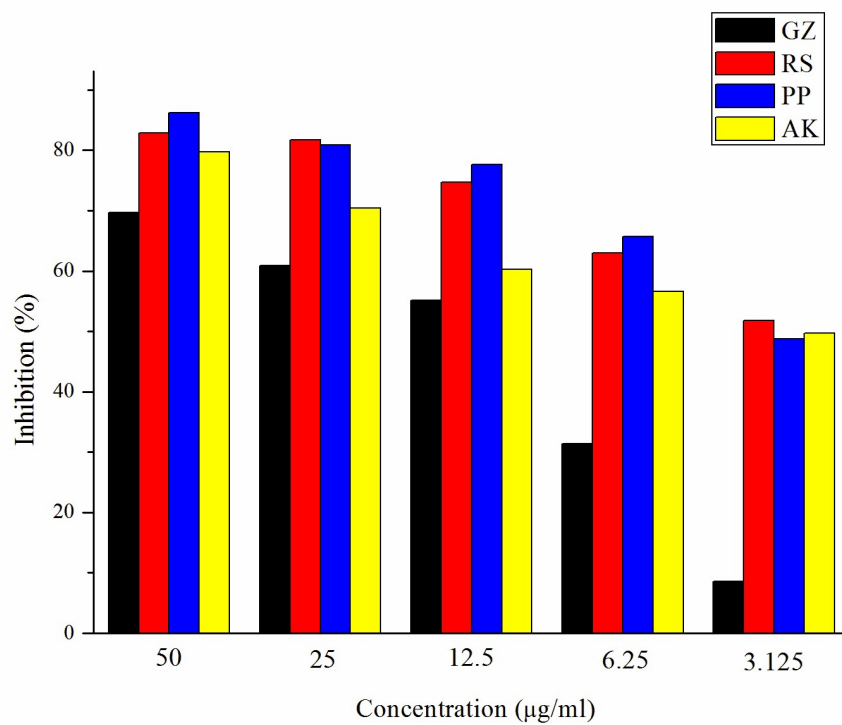

Figure S1. Percentage inhibition of complex 2

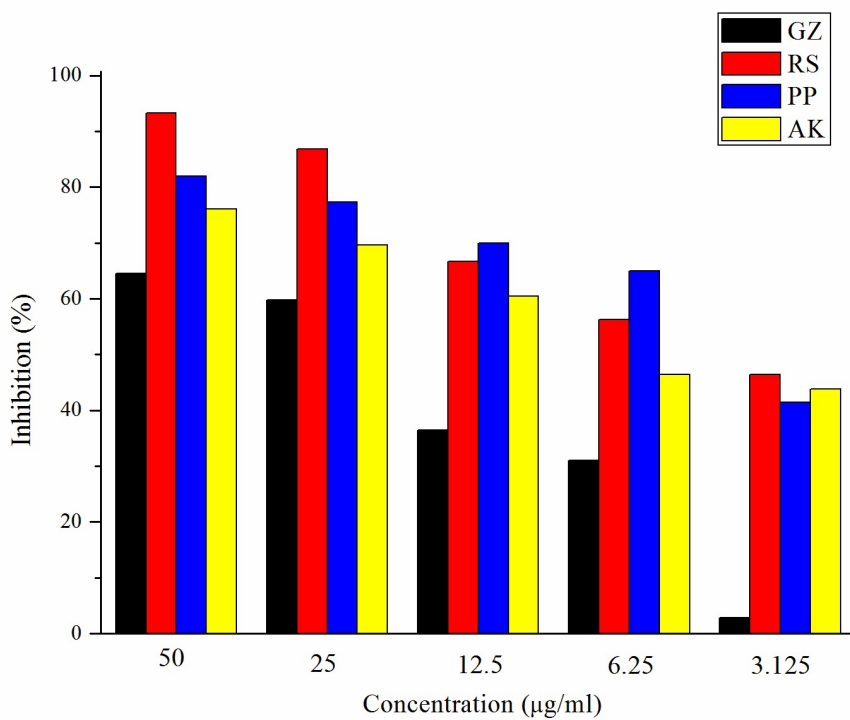

Figure S2. Percentage inhibition of complex 4

### 3. <sup>1</sup>H NMR spectra



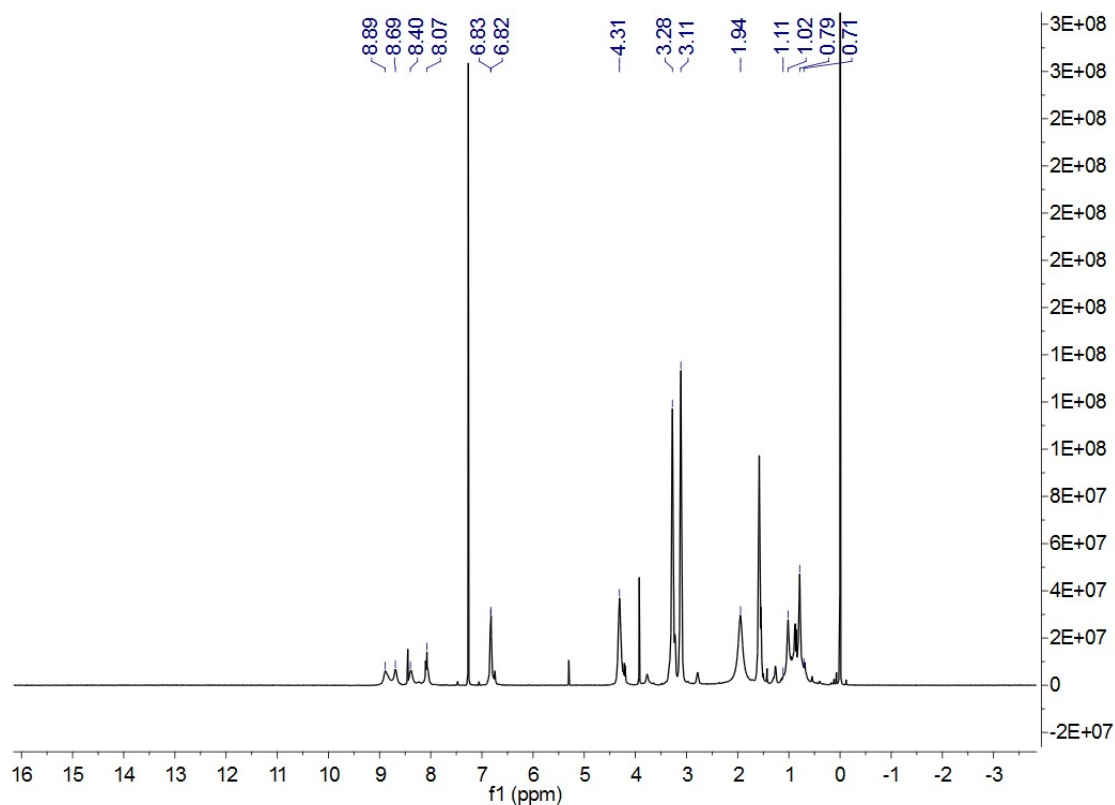

Figure S3.  $^1\text{H}$  NMR spectra( $\text{CDCl}_3$ , 500.00 MHz, ppm) data of complex 1

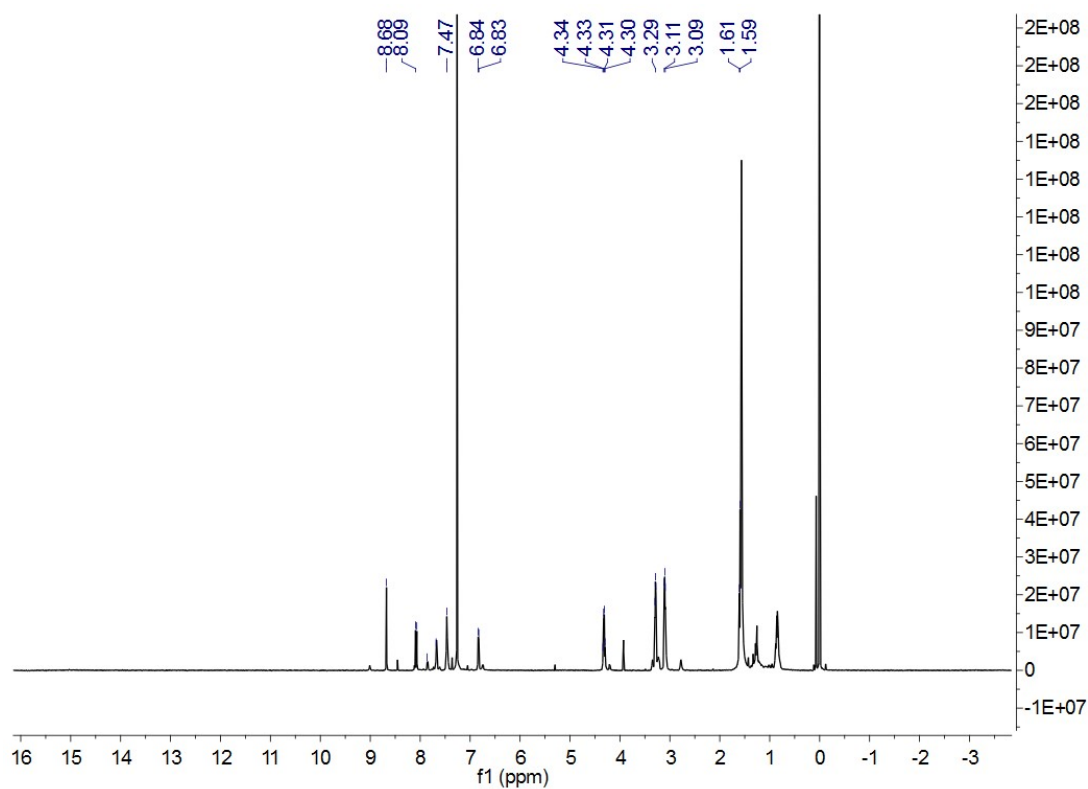

Figure S4.  $^1\text{H}$  NMR spectra( $\text{CDCl}_3$ , 500.00 MHz, ppm) data of complex 2

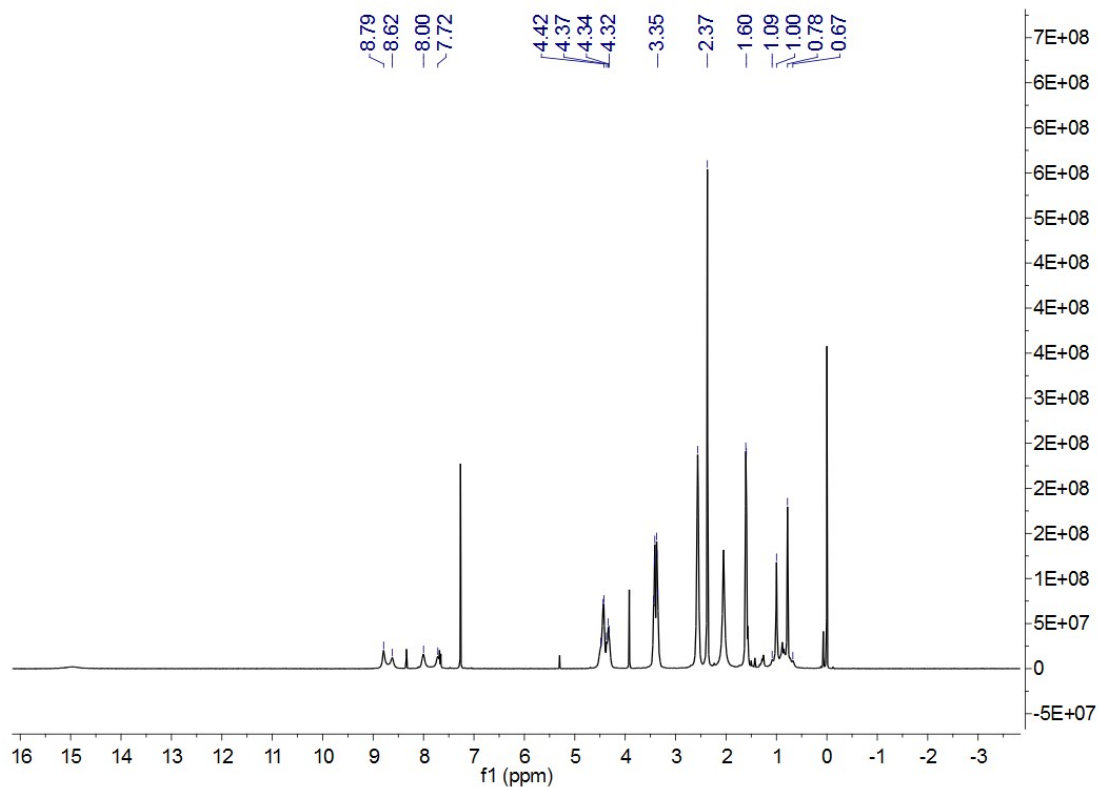

Figure S5.  $^1\text{H}$  NMR spectra( $\text{CDCl}_3$ , 500.00 MHz, ppm) data of complex 3

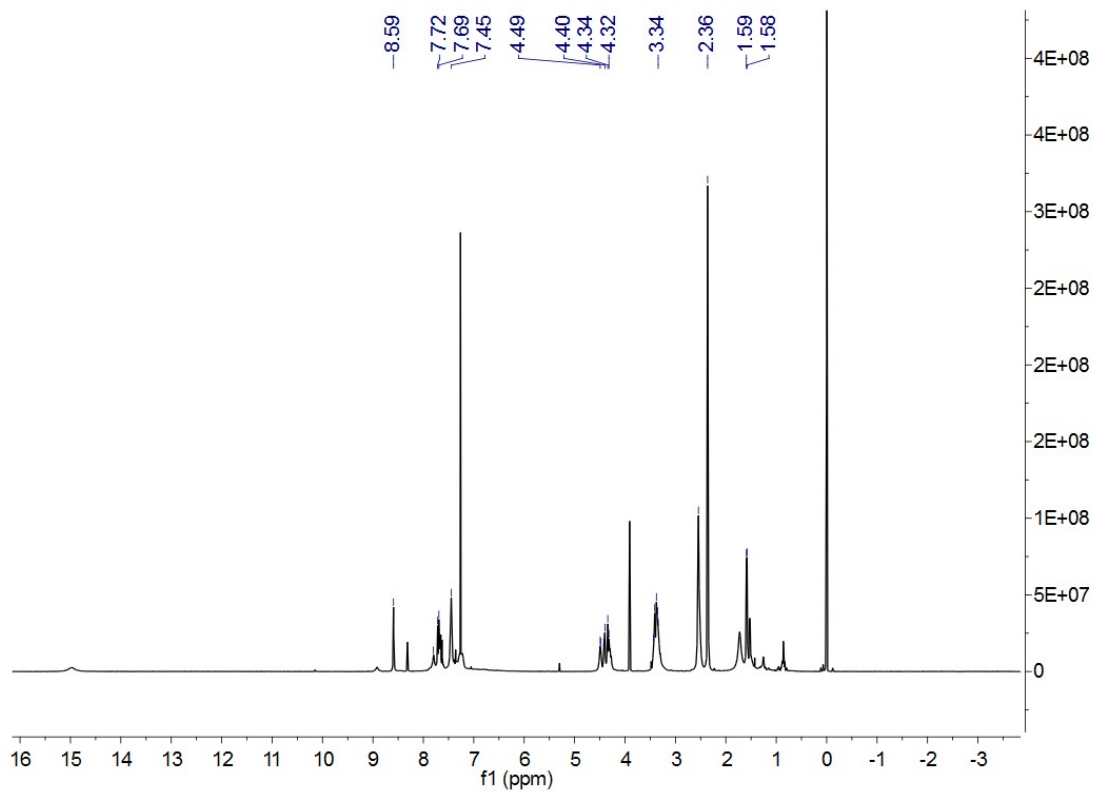

Figure S6.  $^1\text{H}$  NMR spectra( $\text{CDCl}_3$ , 500.00 MHz, ppm) data of complex 4

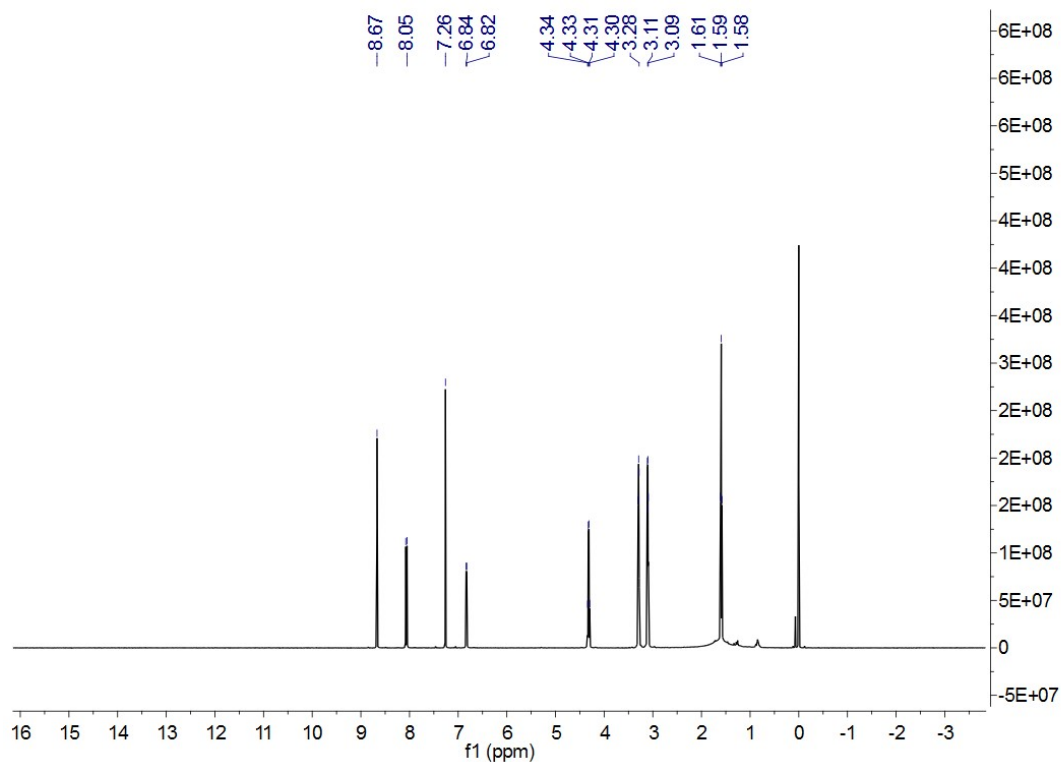

Figure S7. <sup>1</sup>H NMR spectra(CDCl<sub>3</sub>, 500.00 MHz, ppm) data of HL<sub>1</sub>

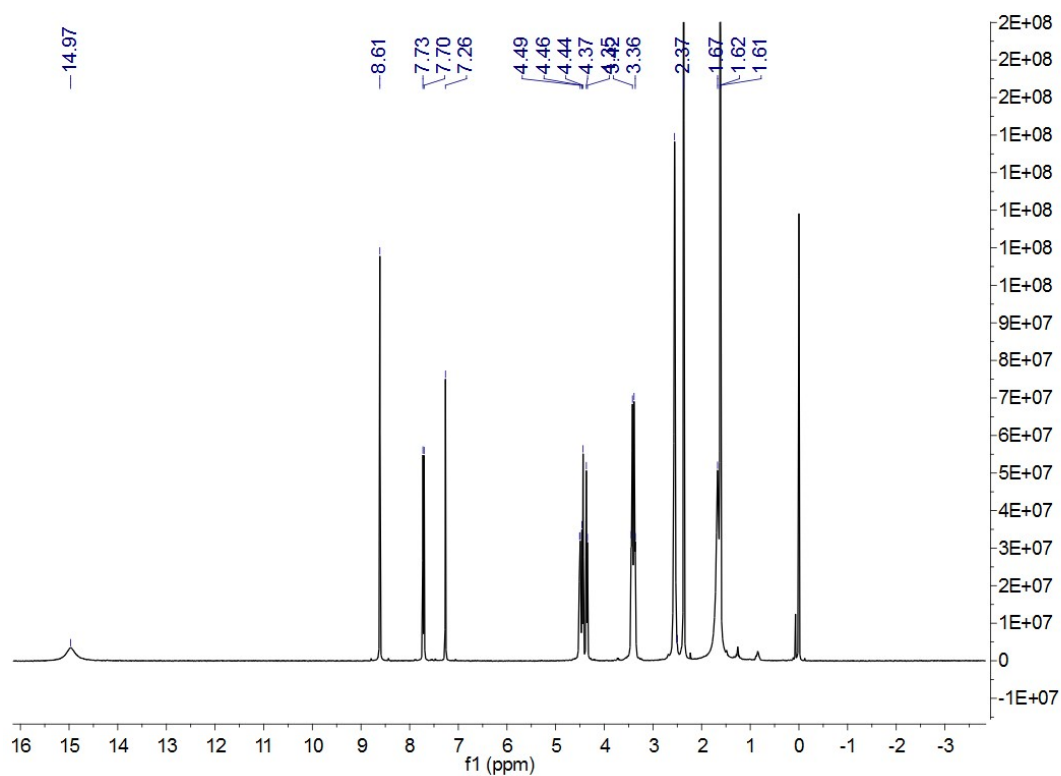

Figure S8. <sup>1</sup>H NMR spectra(CDCl<sub>3</sub>, 500.00 MHz, ppm) data of HL<sub>2</sub>

#### 4. $^{13}\text{C}$ NMR spectra

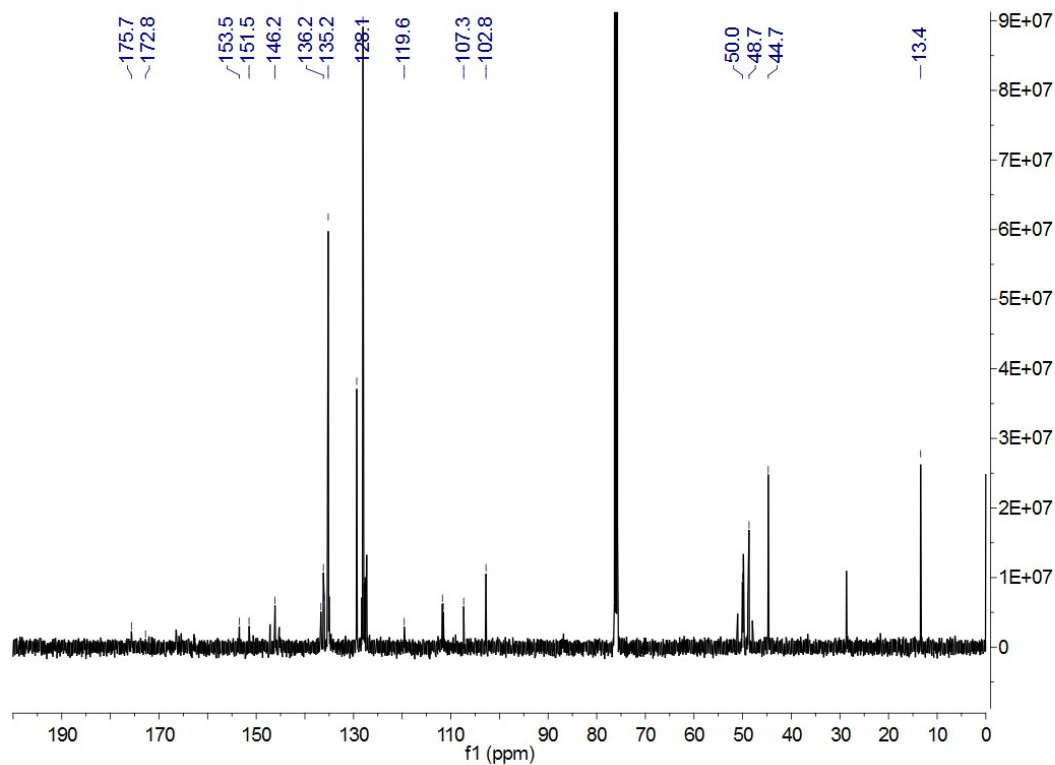

Figure S9.  $^{13}\text{C}$  NMR ( $\text{CDCl}_3$ , 125.7 MHz ppm) data of complex 2

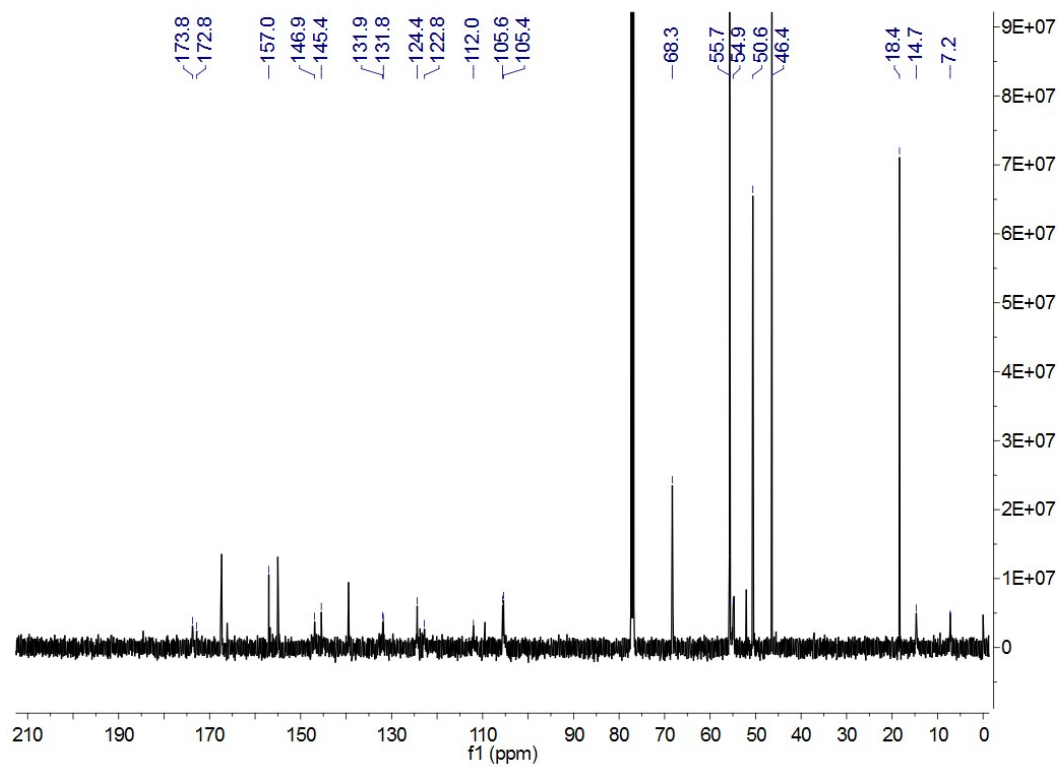

Figure S10.  $^{13}\text{C}$  NMR ( $\text{CDCl}_3$ , 125.7 MHz ppm) data of complex 3

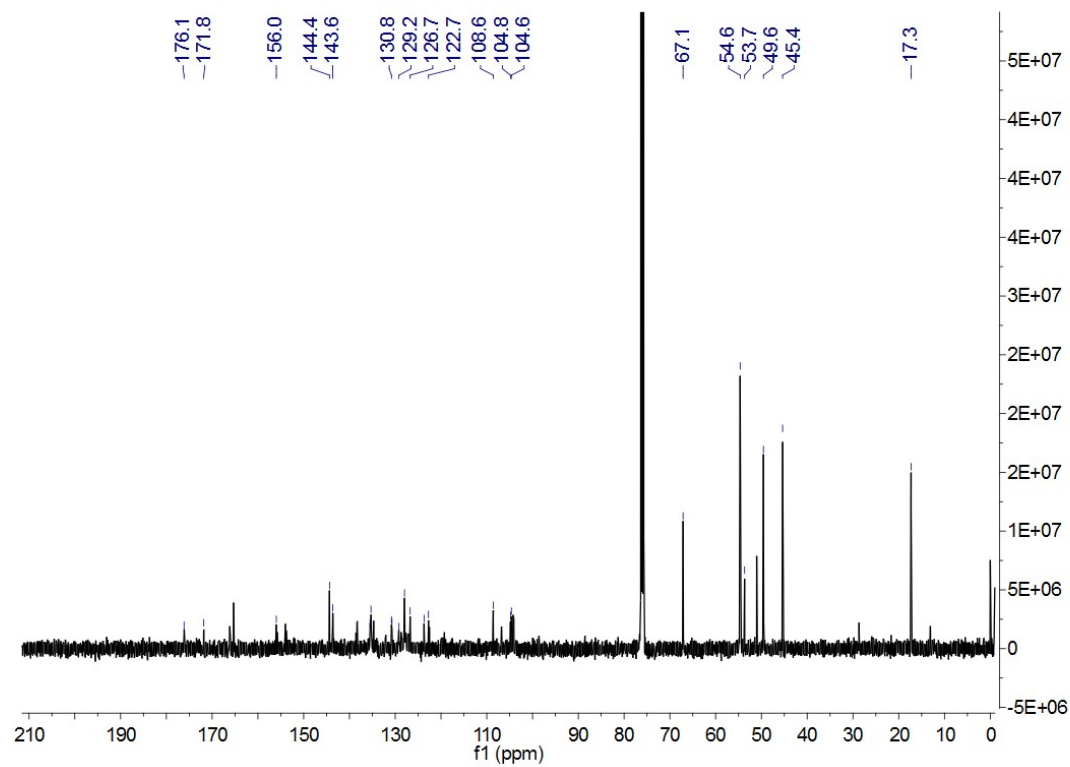

Figure S11.  $^{13}\text{C}$  NMR ( $\text{CDCl}_3$ , 125.7 MHz ppm) data of complex 4

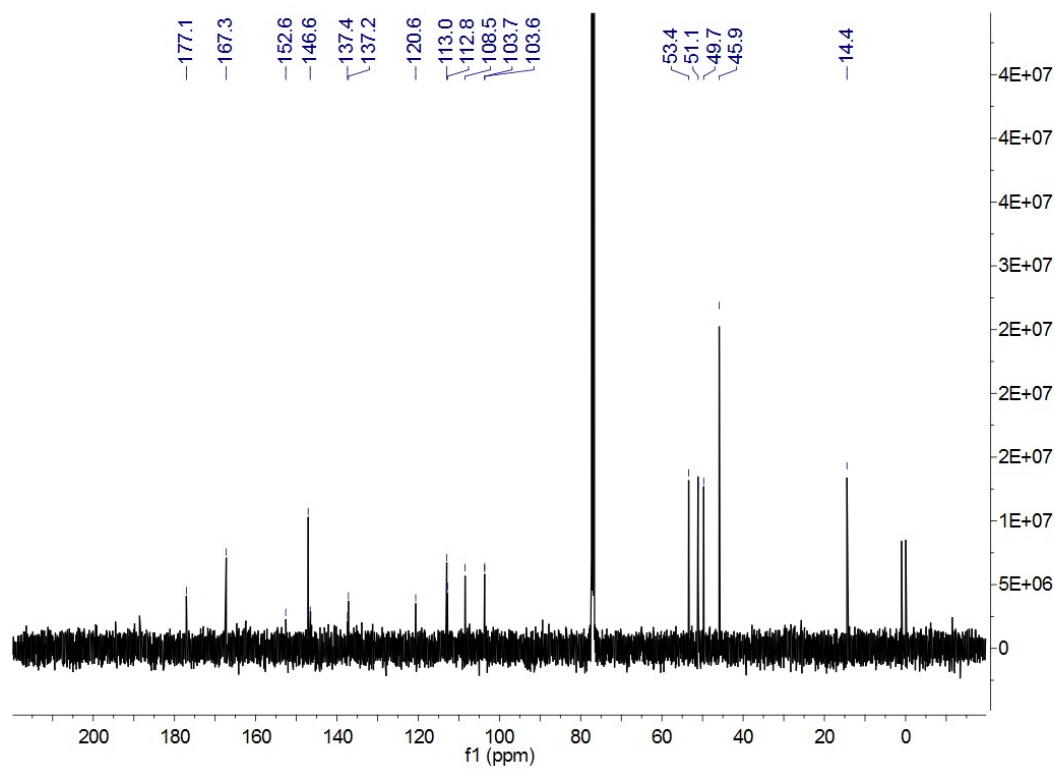

Figure S12.  $^{13}\text{C}$  NMR ( $\text{CDCl}_3$ , 125.7 MHz ppm) data of HL<sub>1</sub>

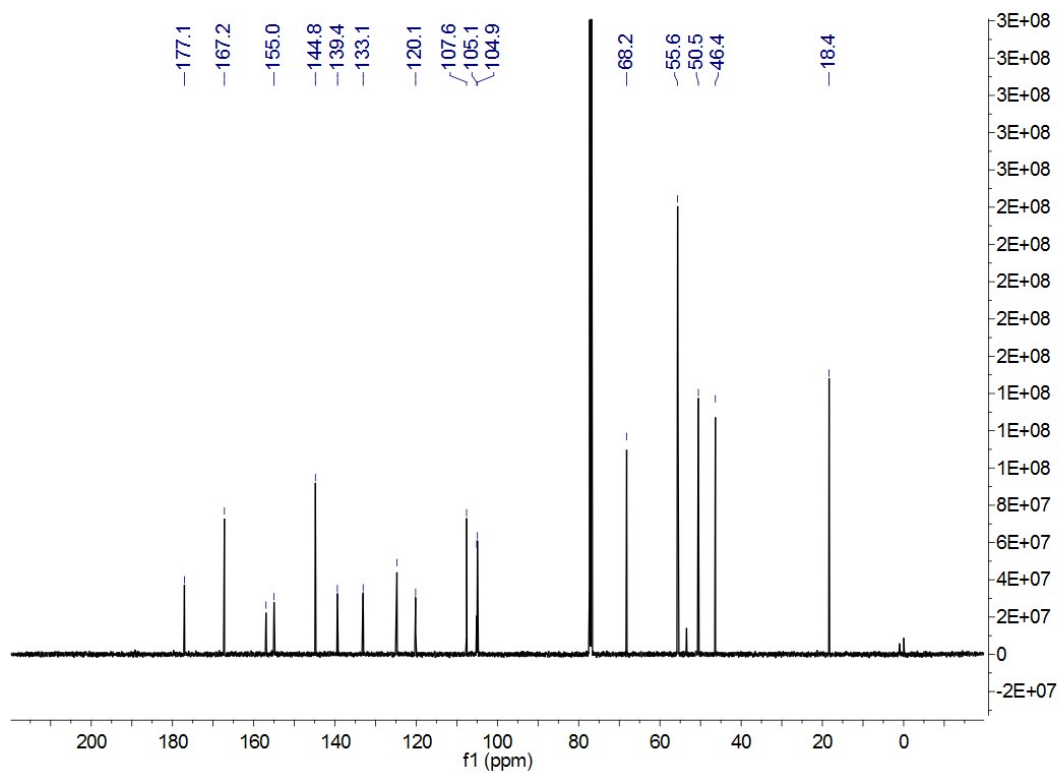

Figure S13.  $^{13}\text{C}$  NMR ( $\text{CDCl}_3$ , 125.7 MHz ppm) data of  $\text{HL}_2$

### 5. $^{119}\text{Sn}$ NMR spectra

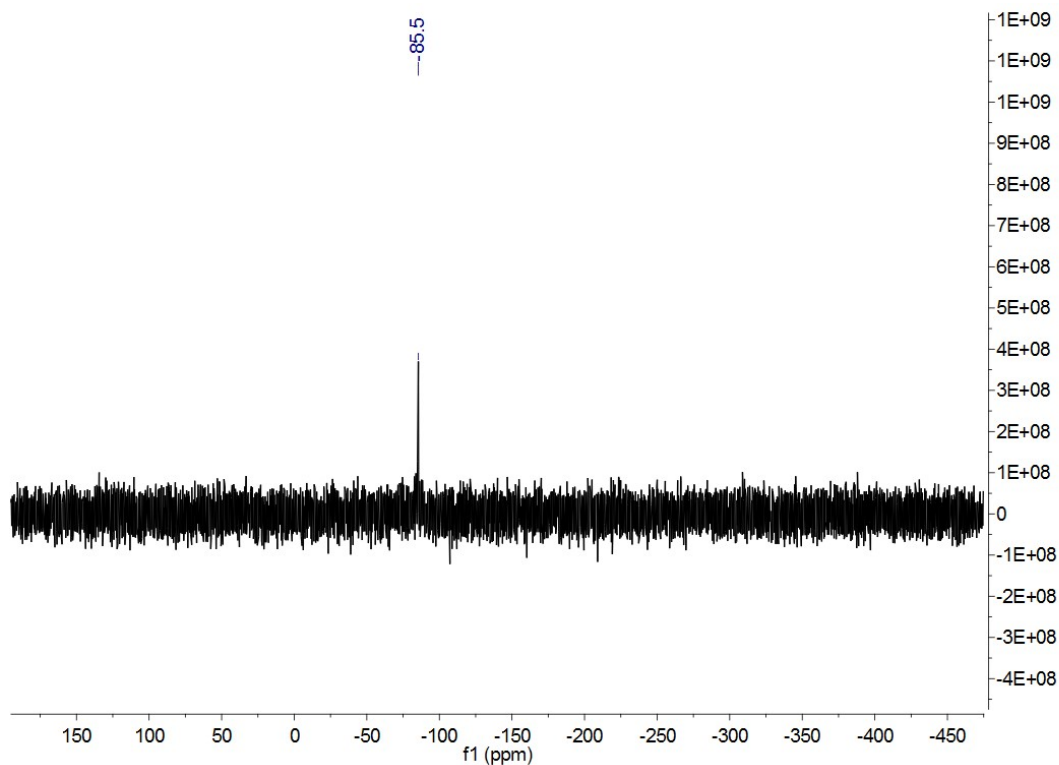

Figure S14.  $^{119}\text{Sn}$  NMR ( $\text{CH}_2\text{Cl}_2$ , 186.5 MHz ppm) spectra data of complex **2**

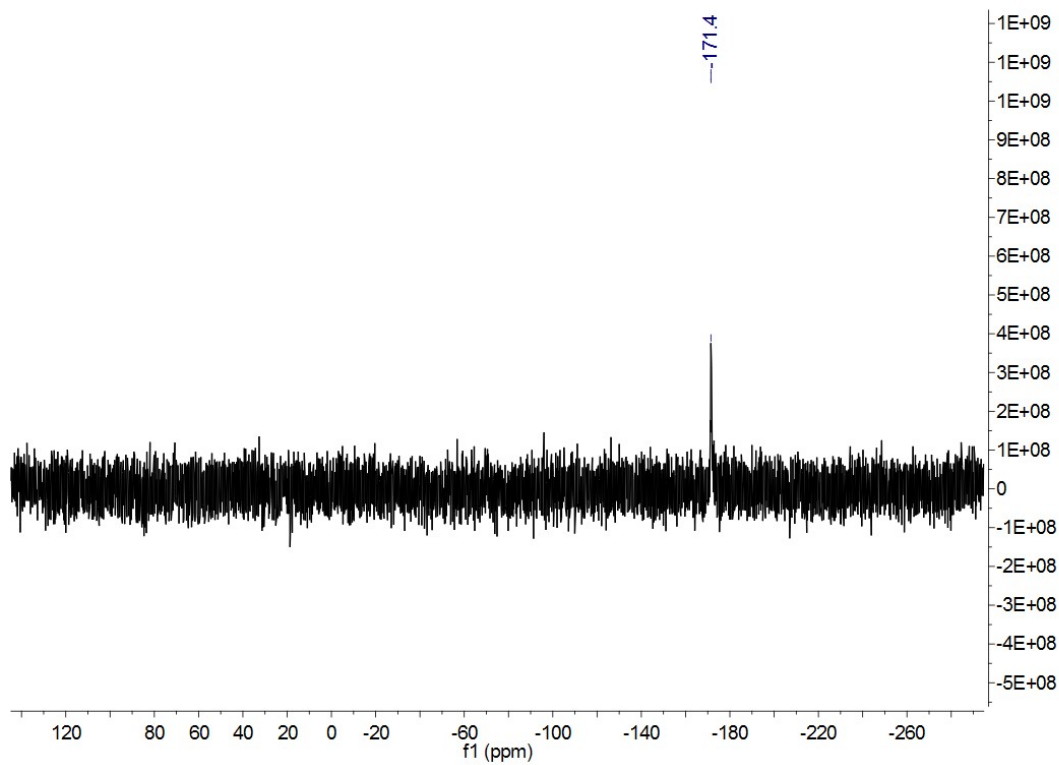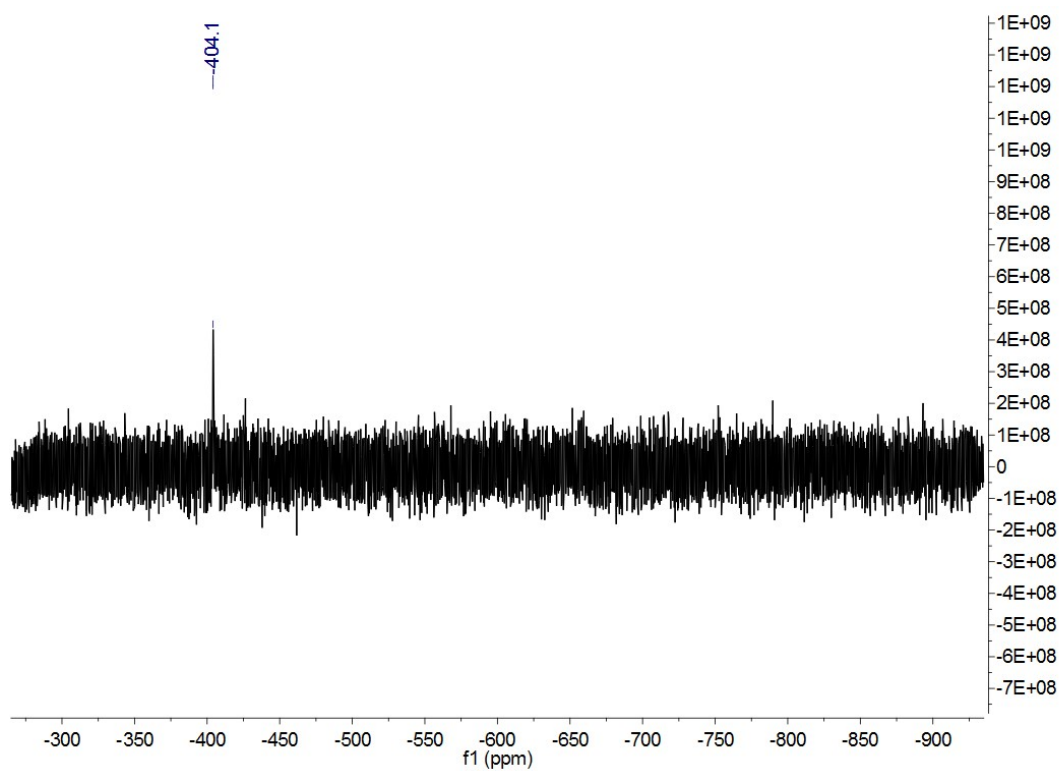

**Figure S15.**  $^{119}\text{Sn}$  NMR ( $\text{CH}_2\text{Cl}_2$ , 186.5 MHz ppm) spectra data of complexes **3**

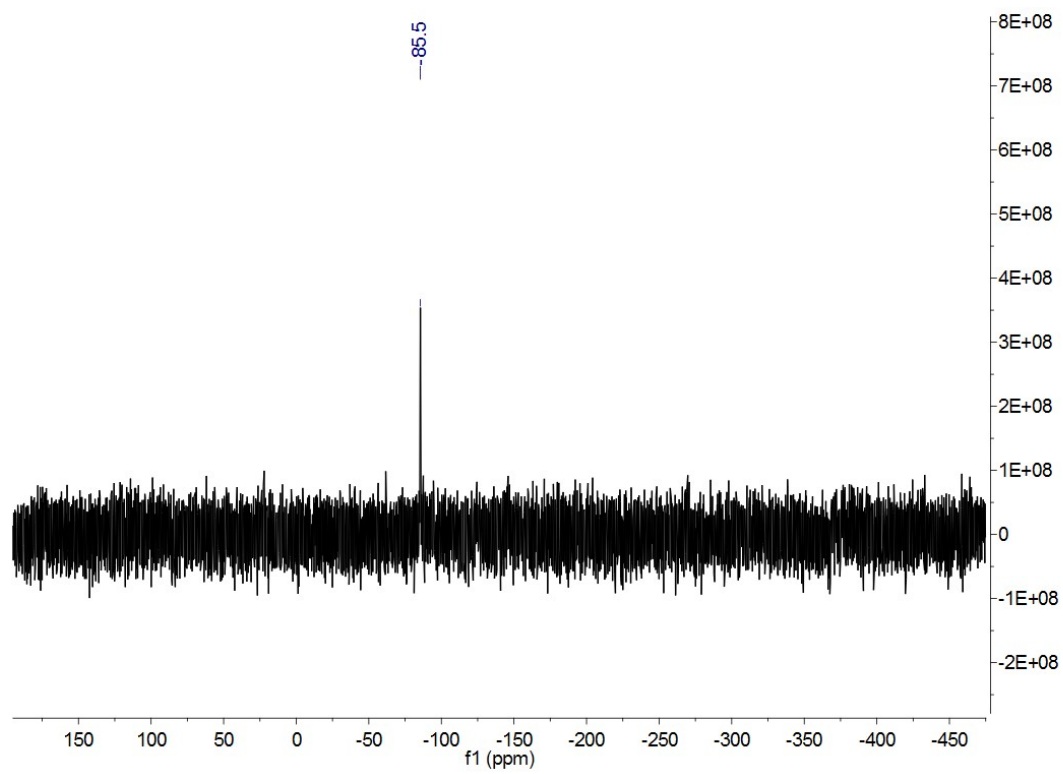

**Figure S16.**  $^{119}\text{Sn}$  NMR ( $\text{CH}_2\text{Cl}_2$ , 186.5 MHz ppm) spectra data of complexes **4**



## 6. HSQC of HL<sub>1</sub> and complex 2

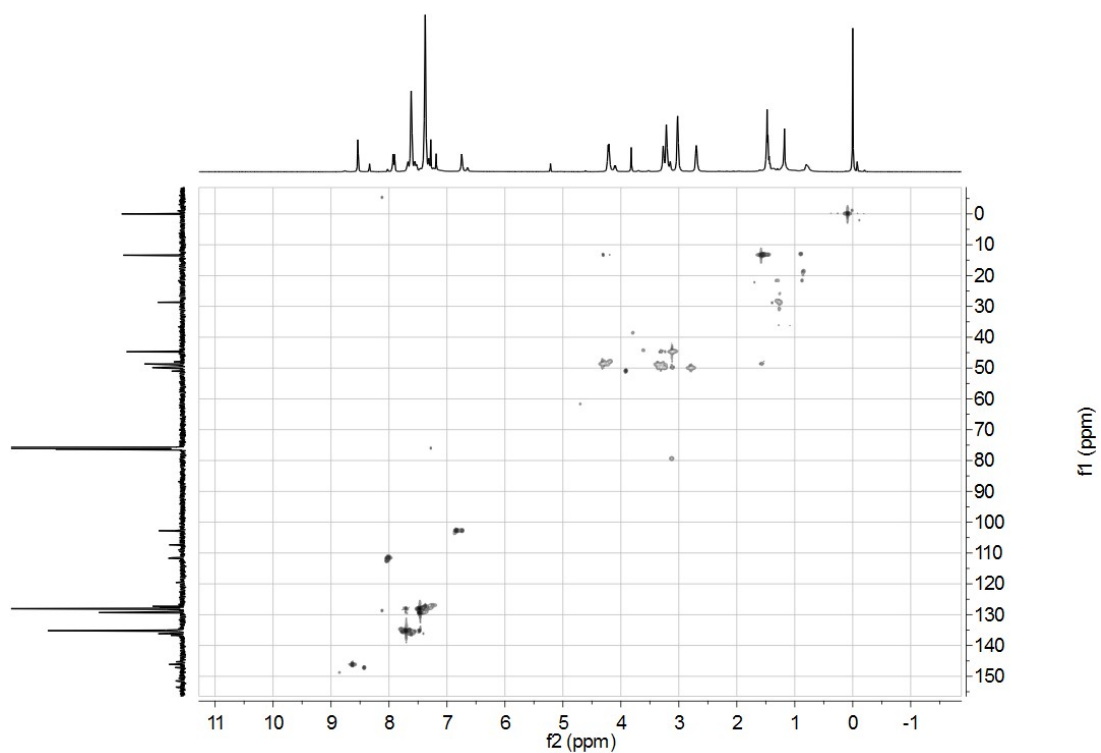

Figure S17. HSQC spectrum for complex 2

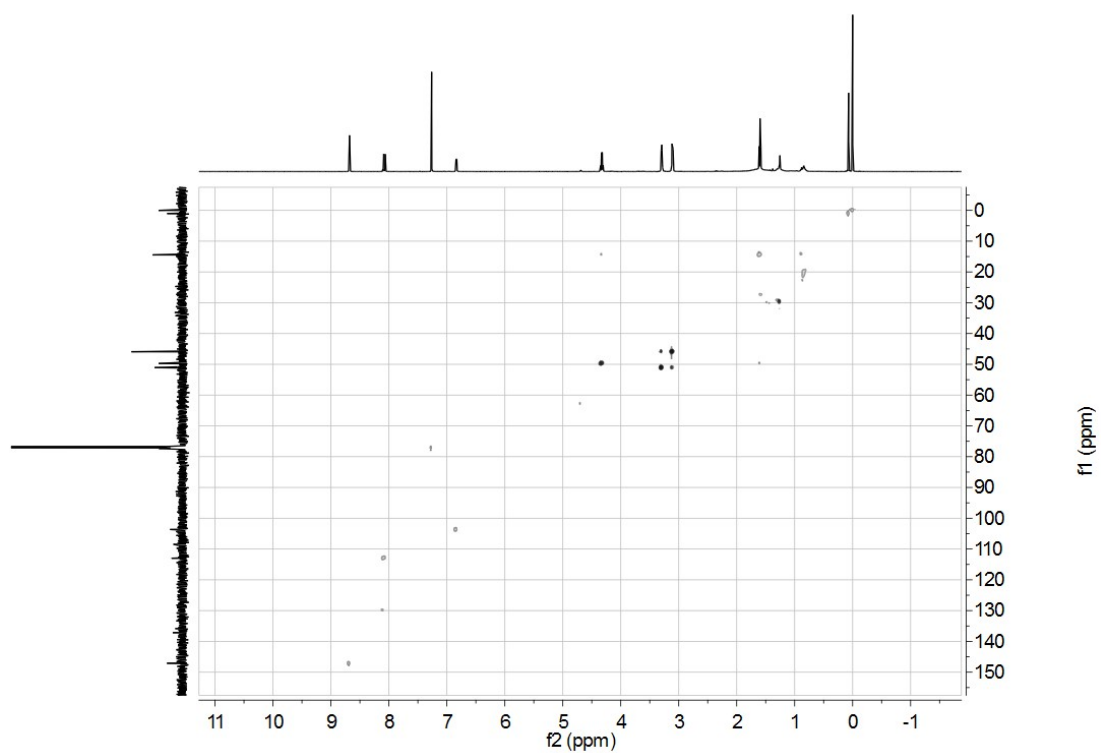

Figure S18. HSQC spectrum for HL<sub>1</sub>

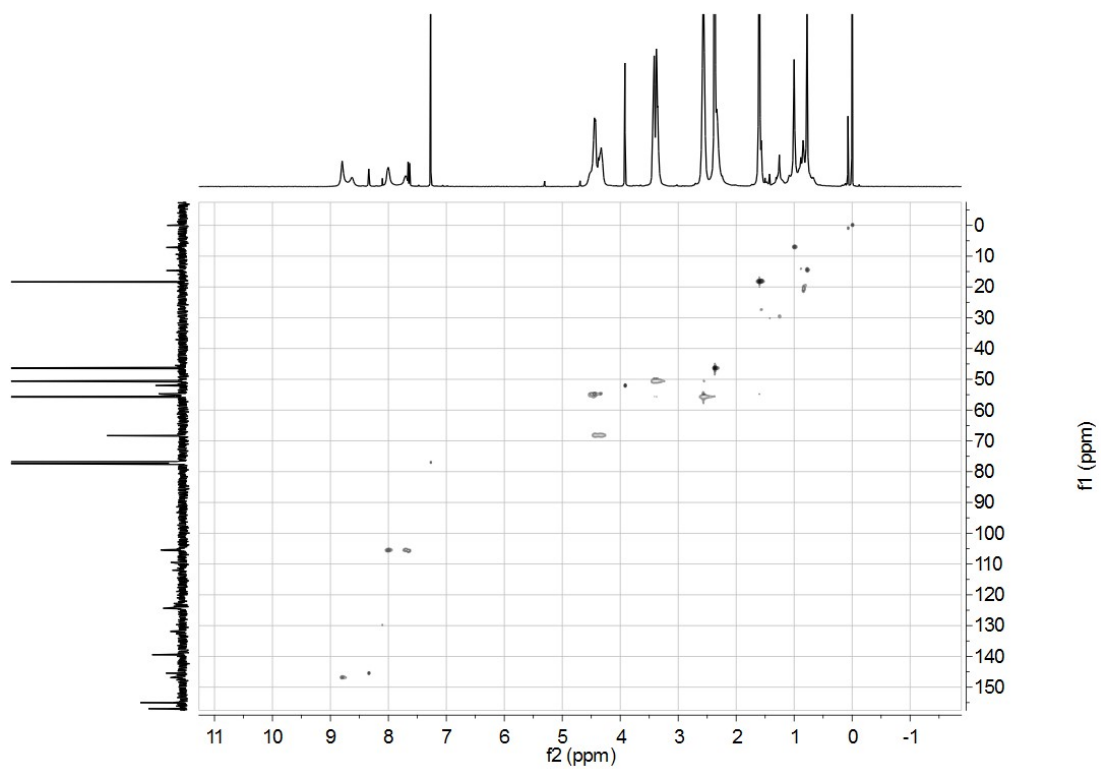

**Figure S19.** HSQC spectrum for Complex 3

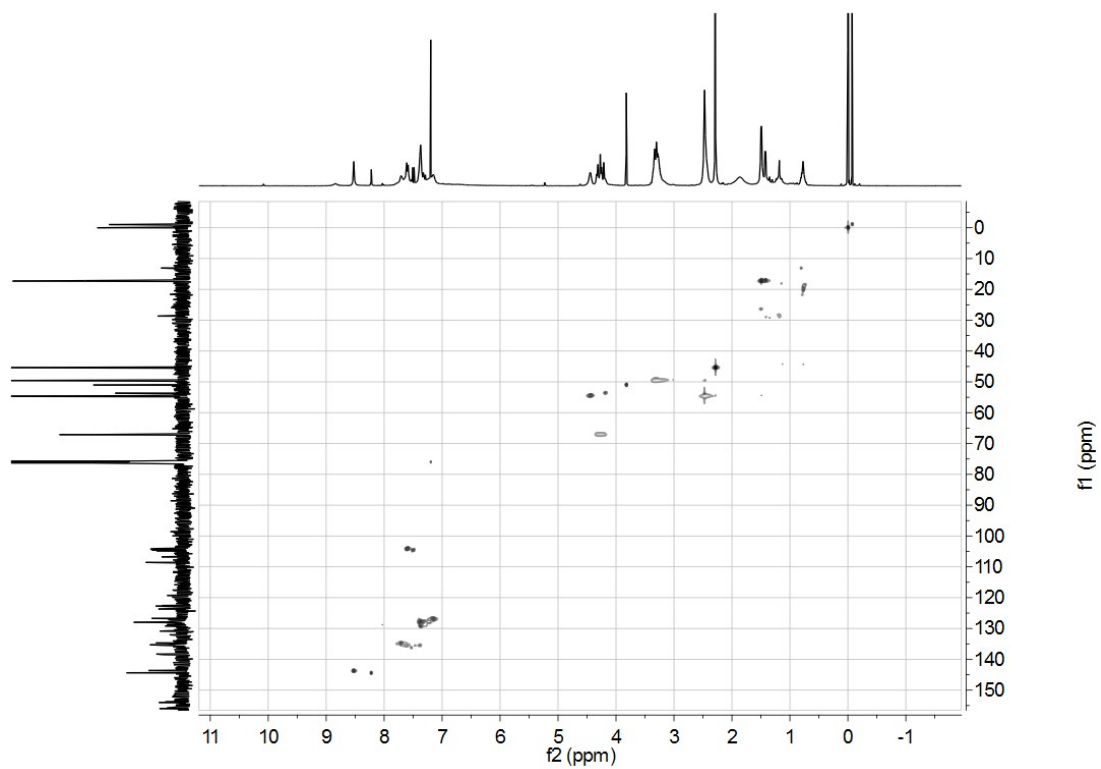

**Figure S20.** HSQC spectrum for Complex 4

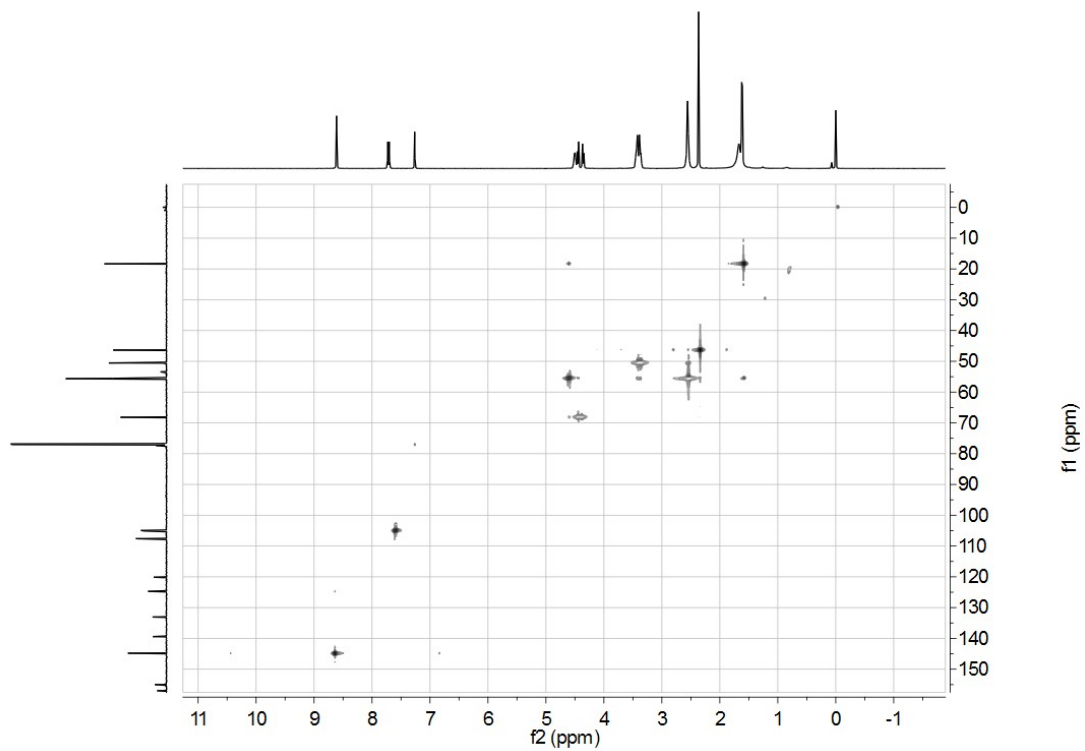

Figure S21. HSQC spectrum for HL<sub>2</sub>

### 7. ADPs of complexes 2-4

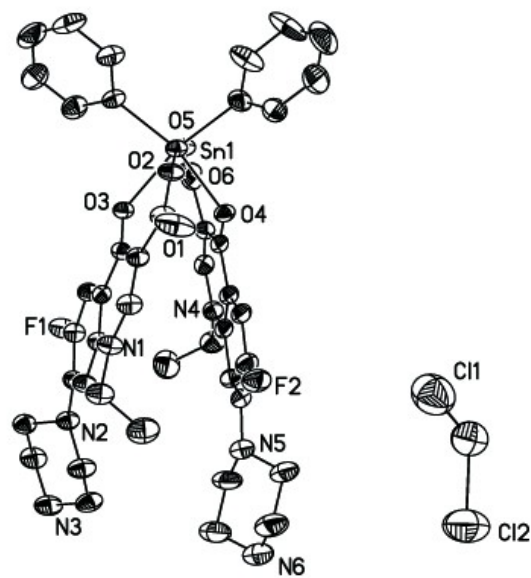

Figure S22. Molecular structure of complex 2 which the ellipsoids are represented at 30% probability

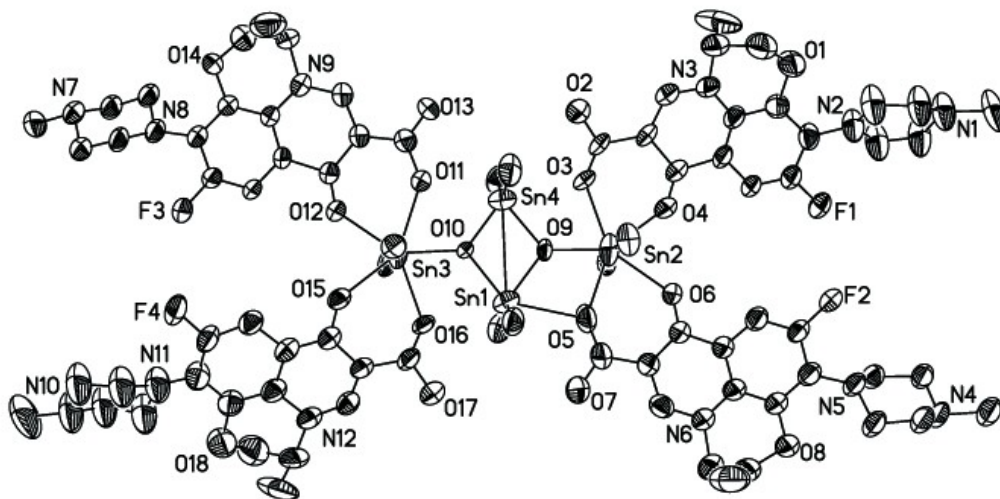

**Figure S23.** Molecular structure of complex **3** which the ellipsoids are represented at 30% probability

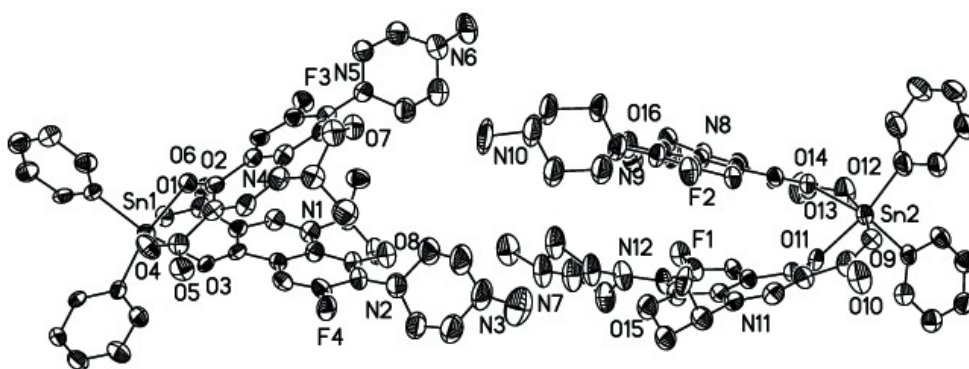

**Figure S24.** Molecular structure of complex **4** which the ellipsoids are represented at 30% probability
